# Supplementary material
Source: HighWire-hosted journal article supplement (http://www.cfp.ca/highwire/filestream/32053/field_highwire_adjunct_files/0/Algorithm_Fr.pdf)
Supplement: Algorithm_Fr.pdf [file Algorithm_Fr.pdf]

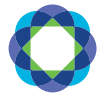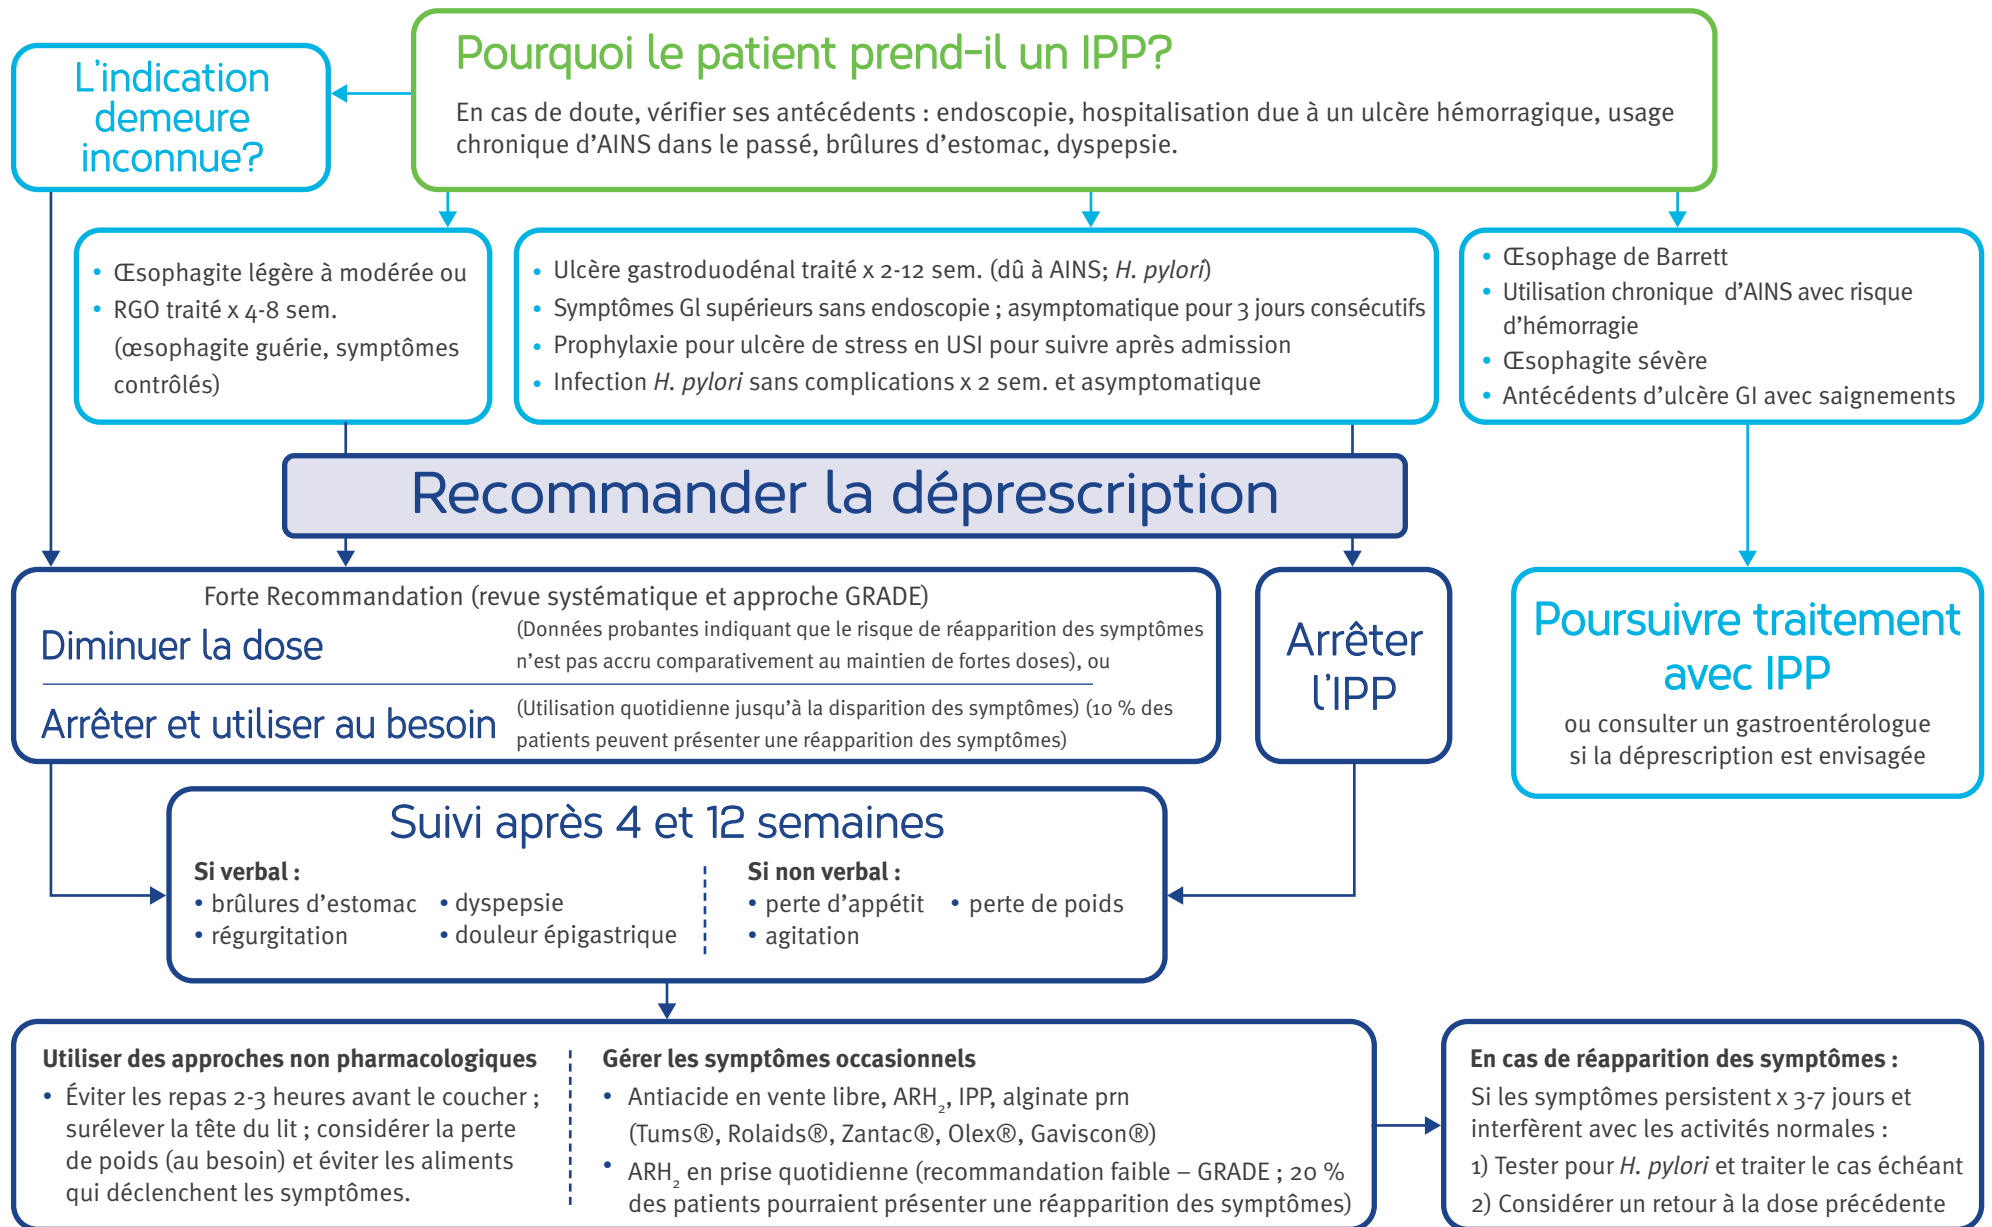

© Utilisation libre, avec citation des auteurs. Usage non commercial. Ne pas modifier ou traduire sans permission.

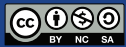

Document sous licence internationale Creative Commons Attribution-Non Commerciale-ShareAlike 4.0.  
 Contact : [deprescribing@bruyere.org](mailto:deprescribing@bruyere.org) ou visiter le site [deprescribing.org](http://deprescribing.org) pour de plus amples renseignements.

Farrell B, Pottie K, Thompson W, Boghossian T, Pizzola L, Rashid FJ, et al. Déprescrire les inhibiteurs de la pompe à protons. Lignes directrices de pratique clinique fondées sur les données probantes. *Can Fam Physician* 2017;63:354-64 (ang), e253-65 (fr).

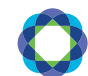

deprescribing.org

INSTITUT DE RECHERCHE

Bruyère  
 RESEARCH INSTITUTE

open+  
 ONTARIO PHARMACY RESEARCH COLLABORATION

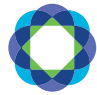

## Disponibilité de l'IPP

| IPP                                         | Dose standard (guérison) (1 fois/jour)* | Faible dose (maintien) (1 fois/jour) |
|---------------------------------------------|-----------------------------------------|--------------------------------------|
| Oméprazole (Losec®) - Gélule                | 20 mg <sup>a</sup>                      | 10 mg <sup>a</sup>                   |
| Esoméprazole (Nexium®) - Comprimé           | 20 <sup>a</sup> ou 40 <sup>b</sup> mg   | 20 mg                                |
| Lansoprazole (Prevacid®) - Gélule           | 30 mg <sup>a</sup>                      | 15 mg <sup>a</sup>                   |
| Dexlansoprazole (Dexilant®) - Comprimé      | 30 <sup>c</sup> ou 60 <sup>d</sup> mg   | 30 mg                                |
| Pantoprazole (Tecta®, Pantoloc®) - Comprimé | 40 mg                                   | 20 mg                                |
| Rabéprazole (Pariet®) - Comprimé            | 20 mg                                   | 10 mg                                |

## Légende

|                                                            |                                                                                                                                                                                                                                                                                                                                                                      |
|------------------------------------------------------------|----------------------------------------------------------------------------------------------------------------------------------------------------------------------------------------------------------------------------------------------------------------------------------------------------------------------------------------------------------------------|
| <b>a</b> Reflux gastro-œsophagien non érosif               | * Dose standard d'IPP à prise BID seulement indiqué pour le traitement de l'ulcère peptique causé par <i>H. pylori</i> ; la prise d'IPP devrait généralement être arrêtée lorsque la thérapie d'éradication est complétée, à moins de présence de facteurs de risque nécessitant la poursuite de la prise d'IPP (consulter les lignes directrices pour les détails). |
| <b>b</b> Œsophagite secondaire au reflux                   |                                                                                                                                                                                                                                                                                                                                                                      |
| <b>c</b> Reflux gastro-œsophagien symptomatique non érosif |                                                                                                                                                                                                                                                                                                                                                                      |
| <b>d</b> Œsophagite érosive en voie de guérison            |                                                                                                                                                                                                                                                                                                                                                                      |
| <b>+</b> Peut être saupoudré sur les aliments              |                                                                                                                                                                                                                                                                                                                                                                      |

## Acronymes

**RGO** : reflux gastro-oesophagien

**AHR<sub>2</sub>** : Antagoniste du récepteur H<sub>2</sub>

**GRADE** : Grading of Recommendations Assessment, Development and Evaluation

**AINS** : anti-inflammatoires non stéroïdiens

## Participation des patients et soignants/aidants naturels

Les patients et/ou les soignants seront plus aptes à s'engager dans la déprescription s'ils en comprennent les raisons (risques liés à l'usage continu de l'IPP ; thérapie à long terme non nécessaire) et le processus.

## Effets secondaires des IPP

- Lorsque l'indication n'est pas claire, les risques d'effets secondaires peuvent surpasser les bénéfices potentiels.
- Les IPP ont été associés à un risque accru de fractures, infections à *C. difficile* et diarrhées, pneumonie d'origine communautaire, caronc en vitamine B12 et hypomagnésémie.
- Les effets secondaires courants incluent : maux de tête, nausées, diarrhées, éruptions cutanées.

## Réduction des doses

- Aucune donnée n'indique qu'une approche de réduction des doses est supérieure à une autre.
- La réduction des doses d'IPP (p.ex. de 2x à 1x/jour, moitié de dose, prise un jour sur deux) OU l'arrêt de l'IPP et son utilisation au besoin sont toutes des options fortement recommandées.
- Choisir ce qui convient le mieux au patient, ce qui lui paraît le plus acceptable.

## Prise au besoin : définition

La prise quotidienne de l'IPP pendant une période suffisante à la disparition des symptômes liés au reflux, après quoi la prise d'IPP par l'individu est arrêtée. Si les symptômes réapparaissent, recommencer la prise quotidienne du médicament jusqu'à disparition des symptômes.

© Utilisation libre, avec citation des auteurs. Usage non commercial. Ne pas modifier ou traduire sans permission.

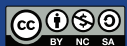

Document sous licence internationale Creative Commons Attribution-Non Commerciale-ShareAlike 4.0.  
Contact : [deprescribing@bruyere.org](mailto:deprescribing@bruyere.org) ou visiter le site [deprescribing.org](http://deprescribing.org) pour de plus amples renseignements.

Farrell B, Pottie K, Thompson W, Boghossian T, Pizzola L, Rashid FJ, et al. Déprescrire les inhibiteurs de la pompe à protons. Lignes directrices de pratique clinique fondées sur les données probantes. *Can Fam Physician* 2017;63:354-64 (ang), e253-65 (fr).

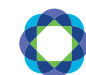

[deprescribing.org](http://deprescribing.org)

INSTITUT DE RECHERCHE  
**Bruyère**  
RESEARCH INSTITUTE

open+  
ONTARIO PHARMACY RESEARCH COLLABORATION
